1 **Gene networks and expression quantitative trait loci associated with platinum-based**  
2 **chemotherapy response in high-grade serous ovarian cancer**

3 Jihoon Choi<sup>1</sup>, Anastasiya Tarnouskaya<sup>2</sup>, Sean Neddoly<sup>2</sup>, Danai G. Topouza<sup>1</sup>, Madhuri Koti<sup>1</sup>,  
4 Qing Ling Duan<sup>1,2</sup>

5 <sup>1</sup>Department of Biomedical and Molecular Sciences, Queen's University, Kingston, Ontario,  
6 Canada; <sup>2</sup>School of Computing, Queen's University, Kingston, Ontario, Canada;

7 Correspondence: QL Duan ([qingling.duan@queensu.ca](mailto:qingling.duan@queensu.ca))

## 8 **Abstract**

9 **Introduction:** A major impediment in the treatment of ovarian cancer is the relapse of  
10 platinum-resistant tumors, which occurs in approximately 25% of patients. A better  
11 understanding of the genetic mechanisms underlying response to platinum-based  
12 chemotherapy will improve treatment efficacy.

13 **Objectives:** We used a systems biology approach to identify novel gene networks and  
14 regulatory sequence variants associated with platinum-based chemotherapy response.

15 **Methods:** From the Cancer Genome Atlas (TCGA), we classified high-grade serous ovarian  
16 carcinoma (HGSOC) patients who remained cancer-free 12 months following completion of  
17 platinum-based chemotherapy as “chemo-sensitive” (N=160) and those who had cancer  
18 recurrence within six months of chemotherapy as “chemo-resistant” (N=110). Both univariate  
19 and multivariate analysis of gene expression microarrays identified differentially expressed  
20 genes and co-expression networks associated with chemotherapy response. Moreover, we  
21 integrated genomics data to determine expression quantitative trait loci (eQTL).

22 **Results:** One differentially expressed gene encoding Valosin-containing protein (VCP) and  
23 five co-expression network modules were associated with chemotherapy response in HGSOC  
24 patients. These genes contribute to protein processing in the endoplasmic reticulum, which  
25 has been previously implicated in variable chemotherapy response. In addition, 192 eQTLs  
26 were associated with co-expressed gene modules as well as genes regulating cholesterol  
27 levels, also previously described to affect chemotherapy response.

28 **Conclusion:** This study implicates known and novel gene networks underlying response to  
29 platinum-based chemotherapy among HGSOC patients. A better understanding of the genetic

30 determinants of chemotherapy response will facilitate genetic testing for predicting drug  
31 response, which will increase treatment efficacy and identify patients for alternative therapies.  
32

### 33 **Introduction**

34 Ovarian cancer is the most lethal gynecological malignancy and the 8<sup>th</sup> leading cause of  
35 cancer death in women around the world.<sup>1</sup> According to the Global Cancer Observatory  
36 report in 2012, ovarian cancer accounts for 3.6% of all cancer cases and 4.3% of all cancer  
37 related deaths worldwide.<sup>2</sup> High-grade serous ovarian carcinoma (HGSOC) is the most  
38 malignant form of ovarian cancer that accounts for up to 70% of all cases.<sup>3</sup> Routine diagnosis  
39 is often difficult due to the lack of mass screening methods and heterogenous manifestations  
40 of the cancer symptoms, which result in approximately 75% of patients diagnosed with  
41 advanced stages.<sup>4</sup> The average 5-year survival rates are 39% for Stage 3 and 17% for Stage 4  
42 cancers.<sup>1</sup>

43         The current standard of care for ovarian cancer is aggressive cytoreductive surgery  
44 followed by platinum-based chemotherapy.<sup>4</sup> However, this standard of care is not effective  
45 for all patients, with approximately 25% experiencing relapse within six months following  
46 platinum-based therapy, likely due to the development of antineoplastic resistance.<sup>5</sup> The  
47 median survival time for recurrent ovarian cancers range from 12-24 months.<sup>6,7</sup> Treatment  
48 options for patients with recurrent ovarian cancer include non-platinum-based chemotherapy  
49 regimens, immunotherapy, and molecular targeted therapy.<sup>7,8</sup>

50         Ovarian cancer has a multifactorial etiology that includes genetic and non-genetic  
51 risk factors. An estimated 23% of cases are hereditary, but the majority are sporadic with  
52 multiple reported risk factors such as history of gravidity, infertility, and late age  
53 menopause.<sup>9,10</sup> A better understanding of the etiology of ovarian cancer, as well as the genetic  
54 mechanisms underlying variable response to platinum-based chemotherapy is needed for  
55 improved diagnosis and treatment. For example, previous studies reported that *BRCA1* and

56 *BRCA2* genes, associated with increased risk of ovarian cancer, harbor mutations associated  
57 with platinum drug sensitivity and survival time.<sup>11</sup> Similarly, tumor suppressor genes such as  
58 *RBI*, *NFI*, *RAD51B*, *PTEN* have been associated with acquired chemotherapy resistance.<sup>12</sup>  
59 Earlier studies have also highlighted the importance of the immune system in the treatment of  
60 ovarian cancer. For example, loss of chemokines and disruptions to the IFN- $\gamma$  pathway have  
61 been associated with poor treatment outcomes in HGSOE patients<sup>13</sup> whereas the NF $\kappa$ B  
62 signaling pathway and elevated expression of *STAT1* were associated with increased response  
63 to platinum therapy.<sup>14,15,16</sup> However, these known genetic variations do not account for all of  
64 the variability in chemotherapy response among HGSOE patients and there is currently no  
65 screening method to accurately predict prognosis prior to start of chemotherapy. Thus, further  
66 studies are necessary to determine additional modulators of chemotherapy response, which  
67 can be used as biomarkers for genetic testing.

68         In this study, we classified HGSOE patients as sensitive to platinum-based  
69 chemotherapy if they did not experience a recurrence one year after completing  
70 chemotherapy. Our definition differs from previous studies which classified patients as  
71 sensitive if they did not relapse after a platinum-free interval of six months or greater (The  
72 Cancer Genome Atlas Research Network, 2011). In addition, we classified patients as  
73 resistant if they experienced tumor progression during chemotherapy or had a recurrence  
74 within the six months following the end of therapy. Our classification of sensitive and  
75 resistant patients are in accordance with the standard Gynecologic Oncology Group (GOG)  
76 criteria.<sup>5</sup> Consequently, we excluded patients who had a recurrence between six to 12 months  
77 after platinum therapy. Our strategy for dichotomizing chemotherapy response using these  
78 “extremes” of response instead of a single threshold aims to enrich for genetic differences  
79 between resistant and sensitive patients.

80           In addition to our novel classification of chemotherapy response in ovarian cancer  
81 patients, we applied a multivariate, systems biology analysis approach to identify and  
82 characterize the gene networks associated with this variable therapeutic outcome. Earlier  
83 studies largely focused on univariate analysis of gene expression data known as differential  
84 gene expression (DGE) analysis<sup>17,18</sup>. This analysis assumes that each gene functions in  
85 isolation within the genome and is limited in statistical power due to multiple testing  
86 corrections to reduce likelihood of false positives. The multivariate approach used in this  
87 study identifies novel connections among genes, which represent potential interactions of  
88 genes within biological pathways or networks. Specifically, we applied Weighted Gene Co-  
89 expression Network Analysis<sup>19</sup> (WGCNA), which uses an unsupervised machine-learning  
90 algorithm to identify clusters of highly correlated or co-expressed genes. Moreover, we  
91 correlated sequence variations with co-expressed gene networks known as expression  
92 Quantitative trait loci (eQTLs). A better understanding of the biological mechanisms  
93 regulating chemotherapy response will enable more effective treatments either by improving  
94 the accuracy of genetic testing or through the identification of novel therapies for cancer  
95 patients.

96

97 **Methods**

98 ***Patient Classification:***

99 Using a cohort of 608 high-grade grade serous ovarian carcinoma (HGSOC) patients from  
100 The Cancer Genome Atlas Project (TCGA), we retrieved clinical data from the Genomic Data  
101 Commons Portal via the TCGAAbiolinks R/Bioconductor package<sup>20</sup>. Among the HGSOC  
102 cases, 587 had available clinical data; these were filtered and subsequently classified into two  
103 distinct groups based on their response to platinum-based chemotherapy. Specifically, we  
104 focused on the time interval between a patients' last primary platinum treatment and the onset  
105 of a recurrent tumor, or progression of an existing one for those patients whose initial tumor  
106 did not undergo complete remission<sup>17</sup>. We excluded patients with insufficient clinical  
107 information, were administered non-platinum drugs, and those who had died for any reason  
108 within a year of initial diagnosis, as they cannot be defined conclusively as sensitive or  
109 resistant to their adjuvant chemotherapy. Of those remaining, a total of 270 patients were  
110 classified as either resistant or sensitive to platinum-based chemotherapy. Patients who  
111 developed a new tumor in less than six months following their last platinum treatment were  
112 defined as resistant (N=110). In contrast, those who did not have a recurrent tumor event  
113 more than a year after their last primary platinum treatment were defined as sensitive  
114 (N=160). Those who had a recurrent tumour event between six months to one year following  
115 therapy were excluded from the study. This strategy was used to enrich for the genetic  
116 differences between the two drug response groups.

117 ***Transcriptomics Data Processing and Analysis:***

118 *Expression Microarrays:* Expression data from the Affymetrix ht\_hg\_u133a microarray chip  
119 was used for univariate and multivariate (co-expression) analysis. Of the 270 subjects

120 classified as sensitive or resistant to chemotherapy, 238 had expression array data (N=138  
121 sensitive, 100 resistant). Array measures were adjusted with robust multi-array average  
122 (RMA)<sup>21</sup>, followed by quantile normalization, and log-transformation using the *affy* package  
123 from Bioconductor<sup>22</sup>. Two potential outliers and two duplicated samples were removed from  
124 the study using the *arrayQualityMetrics* package for quality control (see **Supplemental Data**  
125 **1** for normalization, transformation and quality control assessments), resulting in 135  
126 sensitive and 99 resistant subjects remaining. Probe sets were sorted by median absolute  
127 deviation (MAD), and the top 50% of the probes with highest variation (n=11,107) were  
128 included for analysis. This non-specific filtering step was used to remove non-variable probes,  
129 therefore, reducing multiple testing and likelihood of false positives.

130 Differential Gene Expression Analysis: The *Limma*<sup>23</sup> package in Bioconductor<sup>24</sup> was used to  
131 identify differentially expressed genes between chemo-sensitive and resistant groups, using  
132 linear models. We applied the false discovery rate (FDR) method for multiple testing  
133 correction to reduce the likelihood of false-positive results. Age at diagnosis and stage of  
134 tumor were included as covariates in this analysis (**Supplemental Data 2**).

135 Weighed Gene Co-expression Network Analysis (WGCNA): We performed hierarchical  
136 clustering of genes with the R package *WGCNA*<sup>19</sup>, grouping genes based on their similarity in  
137 expression. This was achieved by first creating a similarity matrix using Pearson correlations  
138 of expression among all genes. The resulting matrix was raised to a soft-thresholding power  
139 of 9, as suggested by the soft-thresholding power estimation plot (**Supplemental Figure 1**).  
140 This process amplifies the connection strength between genes and reduces noise in the  
141 adjacency matrix. To account for topological similarity of genes, the number of shared  
142 neighbors among genes was used to give weight to gene-gene connectivity. To avoid  
143 excessive splitting of genes into smaller modules, minimum module size was set to 30, split



144 sensitivity (deep split) to 4, and modules with similar expression profiles were merged at a  
145 height of 0.5 (**Supplemental Figure 2**). Using principal component analysis, we calculated  
146 module eigengene for each co-expression cluster to summarize module expression into a  
147 single measure. Each module eigengene was tested for association with platinum  
148 chemotherapy response using generalized linear models, while adjusting for age at diagnosis  
149 and stage of cancer as covariates. Finally, we used *Cytoscape*<sup>25</sup>, an open source  
150 bioinformatics platform, to visualize gene co-expression networks.

151 *Gene function and pathway annotations:* We used the Database for Annotation, Visualization  
152 and Integrated Discovery (DAVID)<sup>26</sup> to identify biological pathways and functions that were  
153 enriched in each significant gene co-expression module. We also screened significant genes  
154 in the GeneMANIA<sup>27</sup> database to identify for functional connections reported in published  
155 literature. Next, we searched the UCSC TFBS conservation sites track with DAVID to  
156 identify enriched motifs of transcription factors that may co-regulate genes within the  
157 associated clusters. Finally, we used the drug–gene interaction database (DGIdb)<sup>28</sup>, a public  
158 database with curation of data describing relationships between genes, chemicals, drugs, and  
159 pathological phenotype, to identify genes with prior reported associations with  
160 chemotherapeutic agents.

### 161 ***Genomics Data Processing and Analysis:***

162 *Genomics Data:* Single nucleotide polymorphisms (SNPs) data from the germline tissues  
163 (blood derived normal or solid tissue normal, based on availability) were obtained from the  
164 TCGA legacy database. The Affymetrix Genome-Wide Human SNP Array 6.0 was used to  
165 capture genetic variations, which detected 906,600 SNPs. Of the 270 subjects classified as  
166 resistant or sensitive to platinum-based chemotherapy, 266 (157 sensitive and 109 resistant)

167 had genotype data available.

168 Imputations: The imputation of autosomal chromosomes was performed using the Michigan  
169 imputation server pipeline<sup>29</sup>. We used the 1000 Genome Project phase 3 sequencing data  
170 (version 5)<sup>30</sup> reference panel for the imputation of missing genotypes. We then used Eagle  
171 v.2.3<sup>31</sup> for phasing of the genotypes to their respective chromosomes. For the imputation of  
172 variants on the X chromosome, SHAPEIT<sup>32</sup> was used for phasing in combination with the  
173 1000 genomes project phase 3 (version 5) reference panel (**Supplemental Data 3**).

174 Quality control:

175 *Subject level:* Two pairs of individuals had a relatedness coefficient ( $\pi$ -hat) > 0.9, which are  
176 likely duplicated samples. One subject from each pair was randomly removed from the  
177 dataset. Next, inbreeding coefficients (F) were computed for each subject using PLINK<sup>33</sup>. A  
178 total of 18 subjects with high homozygosity (F>0.05) or heterozygosity (F<-0.05) rates were  
179 excluded. Moreover, sex was computed based on heterozygosity rates (F) of the X  
180 chromosome. Four subjects whose predicted gender was undefined (F>0.2) were removed  
181 from the study.

182 *SNP level:* SNPs with minor allele frequencies (MAF) less than 1% or with genotyping call  
183 rate less than 90% were removed. This step removed 38,430,595 SNPs with MAF < 0.01,  
184 resulting in 9,528,963 SNPs to be used for further analysis.

185 Genome-wide Association Study: After imputations and quality control filtering, 240 subjects  
186 (N= 142 sensitive, 98 resistant) and a total of 9,528,963 SNPs (MAF > 0.1) remained for  
187 analysis (**Supplemental Data 4**). Plink (v.1.90) was applied with association analysis of  
188 platinum-based chemotherapy response using a logistic regression method. Age at diagnosis  
189 and tumor stages were included as covariates.

190 ***Expression Quantitative Trait Loci (eQTL) Analysis:***

191 Common SNPs (MAF > 0.01) were tested for association with gene expression of individual  
192 genes and module eigengenes using the *matrixeQTL* R package<sup>34</sup>. Correlated loci indicated  
193 potential regulatory function of the SNPs on the expression of the nearby corresponding gene,  
194 known as cis-expression Quantitative Trait Loci (cis-eQTL). Cis-eQTL were defined as  
195 correlated SNPs within 1 Mb from the gene transcriptional start site (TSS).

196

197 **Results**

198 Differential gene expression (DGE) analysis returned one significant probe mapping to  
199 Valosin Containing Protein (*VCP*) with FDR adjusted p-value < 0.05 (**Figure 1**) as well as  
200 606 probes mapping to 521 unique genes with nominal significance (unadjusted p-value <  
201 0.05; **Supplemental Table 1**). Functional annotation analysis showed that the 521 genes were  
202 enriched for many oncogenic processes, such as cellular response to DNA damage stimulus  
203 (GO:0006974), DNA repair (GO:0006281), positive regulation of cell growth (GO:0030307),  
204 and positive regulation of apoptotic process (GO:0043065). Pathway analysis identified many  
205 immune related pathways, such as mitogen-activated protein kinase (MAPK) pathway and B-  
206 Cell antigen receptor (BCR) signaling pathway. A detailed list of functional annotations and  
207 identified pathways of differentially expressed genes can be found in **Supplemental Data 5**.

208 The hierarchical clustering of genes using *WGCNA* resulted in 86 unique modules of  
209 co-expressed genes (**Supplemental Table 2**). Each module was assessed for association with  
210 chemotherapy response (**Supplemental Figure 3**). Five gene clusters (*honeydew1*, *lightcyan1*,  
211 *lightpink3*, *orangered4*, and *skyblue3*) were identified to be correlated with sensitivity to  
212 chemotherapy (p < 0.05); one gene cluster remained significant after Bonferroni correction

213 (*honeydew1*,  $p\text{-value}=7e-05$ ) (**Figure 2**). The significant modules were annotated using  
214 DAVID, which identified gene enrichment for biological pathways including apoptosis,  
215 negative regulation of the Wnt signaling pathway, transcription, immune responses, and DNA  
216 double-strand break processing involved in repair via single-strand annealing. GeneMANIA  
217 analysis showed that genes in these modules were previously reported in 49 publications,  
218 some of which documented associations with oncogenic pathways and chemotherapeutic  
219 outcomes. We searched in these genes in the gene-drug interaction database (DGIdb) and  
220 found that 35 were associated with chemotherapeutic agents such as carboplatin and  
221 paclitaxel. Finally, we identified over-represented conserved transcription factor binding sites  
222 located in genes from each module. A detailed list of functional annotations, transcription  
223 factors and pathways related to gene modules can be found in **Supplemental Data 6**.

224 Our genome-wide association study (GWAS) of SNPs did not identify significantly  
225 correlated variants for platinum chemotherapy response. The Manhattan plot (**Figure 3**),  
226 shows that all SNPs fell below the genome-wide significance threshold ( $p < 5 \times 10^{-8}$ ), as  
227 indicated by the red horizontal line. As this may be due to insufficient statistical power, we  
228 performed a targeted association analysis on two well-known genes associated with  
229 chemotherapeutic outcomes in ovarian cancer: *BRCA1* and *BRCA2*. Of the 237 SNPs in  
230 *BRCA1* and 256 in *BRCA2*, we identified 34 SNPs in *BRCA2* and 1 SNP in *BRCA1* that were  
231 significantly associated with chemotherapy response (**Supplemental Table 3**).

232 Next, SNPs were tested for correlation with expression of the 606 differentially  
233 expressed probes and 5 co-expression modules. This identified 5,242 cis-eQTL associated  
234 with the expression of differentially expressed probes, and 192 cis-eQTL associated with co-  
235 expression networks (**Supplemental Data 7**).

236

## 237 **Discussion**

238 In this manuscript, we identified novel genes and gene networks correlated with variable  
239 response to platinum-based chemotherapy in HGSOC patients. Using a univariate analysis  
240 approach, we identified a differentially expressed locus encoding the valosin-containing  
241 protein (*VCP*) associated with sensitivity to platinum-based chemotherapy. In addition, we  
242 applied a multivariate, co-expression analysis method for identifying groups of  
243 interconnected genes that could contribute to common biological pathways. This method  
244 identified 5 clusters of co-expressed genes nominally correlated with chemo-response, one of  
245 which remained significant after correction of multiple testing. Genes in these modules have  
246 been annotated to be associated with biological pathways such as apoptosis, transcription,  
247 immune response, negative regulation of the Wnt signaling pathway and DNA double-strand  
248 break processing involved in repair via single-strand annealing.

249 The most significantly associated probe identified in the DGE analysis was for a  
250 gene encoding Valosin-containing protein (*VCP*,  $p = 3.91E-06$ ). *VCP* plays a critical role in  
251 disintegrating large polypeptide cellular structures for further degradation by proteolytic  
252 enzymes. It functions to regulate important pathways of DNA repair, replication and cell  
253 cycle progression by removing faulty polypeptide structures from chromatin material,  
254 ribosomes, endoplasmic reticulum and mitochondria. This gene has been previously  
255 identified as a potential biomarker for predicting the success of platinum-based chemotherapy  
256 in lung cancer patients.<sup>35</sup> Drugs that inhibit *VCP*, such as the novel inhibitor CB-5083<sup>36</sup>, are  
257 currently being evaluated for their prospective anticancer properties.

258 Many of the nominally correlated genes from our DGE analysis are enriched for

259 pathways known to be critical for oncogenesis and chemotherapeutic drug resistance. For  
260 example, probe 213532\_at mapping to the A Disintegrin and Metalloproteinase-17 (*ADAM17*)  
261 gene was upregulated in the chemo-resistant group ( $p = 0.017$ ). This is consistent with prior  
262 studies, which reported that overexpression of *ADAM17* results in reduced cisplatin-induced  
263 apoptosis in hepatocellular carcinoma cells and may contribute to cisplatin resistance via the  
264 EGFR pathway<sup>37</sup>. Moreover, we identified another up-regulated probe 205239\_at ( $p = 0.003$ )  
265 for the gene encoding Amphiregulin (AREG), a protein found in the EGFR signaling pathway,  
266 which has been reported to promote ovarian cancer stemness and drug resistance to anti-  
267 cancer therapy.<sup>38</sup> Taken together, our findings support a potential role of the AREG-EGFR  
268 signaling pathway in the development of platinum-resistance in ovarian carcinoma.

269 It is also important to note that one of the most enriched pathways from our DGE  
270 analysis was the protein processing in endoplasmic reticulum (hsa04141) pathway. Using  
271 DAVID, we have identified 18 differentially expressed probes mapping to 15 unique genes  
272 within this pathway. Prior studies have highlighted that endoplasmic reticulum (ER) stress  
273 may cause cisplatin resistance in ovarian carcinoma by inducing autophagy in cancer cells,  
274 allowing them to escape apoptosis.<sup>39,40</sup> Findings from this pathway analysis suggest that  
275 future studies of the contribution of ER stress in cisplatin sensitivity is needed to improve our  
276 understanding of platinum-resistance in ovarian cancer.

277 In our co-expression network analysis, the gene module “*honeydew1*” showed the  
278 most significant correlation with chemotherapy response ( $p = 6.53e-05$ ). This module  
279 includes two probes that map to *VCP*, a gene that was associated with platinum-based  
280 chemotherapy response in our DGE analysis. Additional genes in this module were associated  
281 with positive regulation of mitochondrial membrane potential, protein ubiquitination, mitosis,  
282 alternative splicing, and apoptotic processes. Pathway analysis showed that this module is

283 involved in protein processing in the endoplasmic reticulum. A prior study has found that  
284 *VCP* is critical for extraction and degradation of unfolded proteins in endoplasmic reticulum  
285 is crucial for cancer cell survival and lower expression of *VCP* is associated with poor  
286 response to platinum-based chemotherapy.<sup>41</sup> In alignment with this finding, genes co-  
287 expressed in the *honeydew1* module were co-downregulated in chemo-resistant patients.

288         The *honeydew1* module is composed of 76 probes mapping to 54 unique genes, and  
289 of these, 44 genes are found to be in chromosome 9, demonstrating the importance of  
290 chromosome 9 in the regulation of chemo-resistance in ovarian cancer. These findings  
291 support previous studies, where genetic imbalance and alterations in chromosome 9 have  
292 been associated with progression of ovarian cancer and increased cisplatin resistance.<sup>42</sup>  
293 Analysis of overrepresented transcription factor binding sites demonstrated that genes in this  
294 module may be co-regulated by a common transcription factor known as organic cation  
295 transporter 1 (OCT1). We found that over 96% of genes in this module (49/54 genes) contain  
296 a nucleotide motif bound by OCT1. Prior studies have reported that silencing OCT1 impaired  
297 cisplatin-induced apoptosis in esophageal cancer cells, and that cisplatin-resistant cells were  
298 already expressing significantly reduced levels of OCT1.<sup>43</sup> Taken together, these findings  
299 characterize a network of co-expressed genes that is associated with platinum-resistance in  
300 ovarian cancer. Genes within this module may be co-regulated by the OCT1 transcription  
301 factor, which may be used as a novel potential target for ovarian cancer therapies

302         The other four co-expression modules associated with platinum-based response also  
303 include genes known to be involved in oncogenic process and drug response outcomes. For  
304 example, the *orangered4* module is composed of genes that are critical for regulation of  
305 immune response, which have been shown to play a role in chemotherapy response in  
306 HGSOC.<sup>1415</sup> Genes in this module are associated with functional annotation terms including  
15

307 immunoglobulin receptor binding, antigen binding, B cell receptor signaling pathway, and  
308 phagocytosis (DAVID). In addition, 10 of the 58 genes in this module are enriched for a  
309 common transcription factor binding site: acute myeloid leukemia 1 protein (AML1). This  
310 transcription factor is involved in haematopoiesis process and immune functions such as  
311 thymic T-cell development. Studies have reported that the AML1 transcription factor is  
312 overexpressed in ovarian cancer patients, and may contribute to cancer cell proliferation,  
313 migration and invasion.<sup>44</sup> In addition, we found that the *lightpink3* module is strongly  
314 associated with transcription regulation process, which plays a pivotal role in cancer  
315 progression. Finally, genes in modules *lightcyan1* and *skyblue3* are target regions of  
316 chemotherapeutic agents such as tyrosine kinase inhibitors (**Supplemental data 6**).

317         The analysis of *BRCA1* and *BRCA2* SNPs demonstrated that 28 out of 35 variants  
318 associated with chemotherapy response were also cis-acting eQTLs, correlated with the  
319 expression of *BRCA2* as well as neighboring genes *N4BP2L1*, *N4BP2L2*, *FRY*, and *STARD13*  
320 (nominal p-value <0.05). Both *BRCA2* and *STARD13* are well known tumor-suppressors, and  
321 upregulation of *N4BP2L1* and *N4BP2L2* is associated with positive prognosis in ovarian  
322 cancer cases.<sup>45</sup> This finding shows the potential regulatory effect of the variants in *BRCA2*.

323         In addition, our results show that 47% of variants identified in *BRCA2* are associated  
324 with LDL/HDL cholesterol levels (**Supplemental Table 3**). Prior studies of lung and ovarian  
325 cancers consistently reported that cholesterol levels may affect the efficacy of platinum-based  
326 chemotherapeutic agents.<sup>46,47</sup> Our findings indicate a new link between genetic variants in  
327 *BRCA2* and platinum-based chemotherapy response through cholesterol level regulation.

## 328 **Conclusion**

329 In this study, we identified genes and gene networks correlated with platinum-based



330 chemotherapy response in high-grade serous ovarian cancer patients, which implicate known  
331 and novel biological mechanisms. Specifically, we identified that reduced expression of *VCP*  
332 is associated with platinum-resistance. This gene is critical for removing unfolded proteins  
333 from the endoplasmic reticulum and previously correlated with cancer cell survival and  
334 platinum-based chemotherapy response. In addition, we report potentially regulatory variants  
335 in the *BRCA2* gene correlated with chemotherapy response and the expression of genes that  
336 determine cholesterol levels. Moreover, we identified a novel group of potentially co-  
337 regulated genes on chromosome 9 that are correlated with platinum resistance using a  
338 machine-learning algorithm. In addition, genes from this module including *VCP* are also  
339 involved in protein processing in the endoplasmic reticulum. This manuscript supports earlier  
340 studies which implicated *VCP* and *BRCA2* genes in chemotherapy response. We also  
341 identified regulatory variants in *BRCA2* and additional genes co-regulated with *VCP* on  
342 chromosome 9 that also contribute to protein removal in the ER. Findings from our study  
343 could facilitate genetic testing through the identification of gene signatures that may predict  
344 chemotherapy response as well as lead to novel drug targets, given a better understanding of  
345 the biological mechanisms underlying chemotherapy response.

346

## 347 **Figure Legends**

348 **Figure 1. Gene co-expression modules correlated with platinum-based chemotherapy**  
349 **response.** Network plot showing the five significant gene co-expression modules from  
350 *WGCNA*: honeydew1 - centre, lightcyan1 - left, lightpink3 - top, orangered4 - bottom, and  
351 skyblue3 - right. Nodes represent probes and edges are connections among the probes. Co-  
352 expressed probes (i.e. belonging to a single module) are indicated in the same colour.

353 **Figure 2. Differential expression analysis of platinum-based chemotherapy response in**  
354 **HGSOC patients.** Volcano plot showing univariate analysis results. One probe, 208648\_at,  
355 which maps to the Valosin-Containing Protein (*VCP*) gene is significantly correlated with  
356 chemotherapy outcome as indicated by the red line (FDR-corrected p value < 0.05). A total of  
357 606 probes mapping to 521 unique genes with nominal correlate as indicated by the green  
358 line (p = 0.05).

359 **Figure 3. GWAS of chemotherapy response.** Manhattan plot shows no SNPs are  
360 significantly associated (i.e. surpasses the Red line indicating a p-value threshold of  $5 \times 10^{-8}$ ).

361

### 362 **Acknowledgements**

363 Computations in this manuscript were performed on resources and with support provided by  
364 the Centre for Advanced Computing (CAC) at Queen's University in Kingston, Ontario. The  
365 CAC is funded by: the Canada Foundation for Innovation, the Government of Ontario, and  
366 Queen's University. JC is funded by Queen's University, Faculty of Health Sciences Dean's  
367 Doctoral Award. QLD receives funding from the Canadian Institutes of Health Research and  
368 Queen's University.

### 369 **Conflict of interest**

370 The authors declare no conflicts of interest.

### 371 **Author contribution**

372 J.C. performed the data analyses and drafted the manuscript. D.G.T., S.N. and A.T. assisted in  
373 the data analyses. Q.L.D. designed the research project, supervised data analyses and assisted  
374 in the writing of the manuscript. M.K. assisted in the study design and editing of the

375 manuscript.

376

377

378

379 **References**

- 380 1. Reid, F. World Ovarian Cancer Coalition 2018. *World Ovarian Cancer Coalit.* (2018).
- 381 2. International Agency for Research on Cancer Website. Globocan 2012 - Home.  
382 *Webpage* (2012). doi:NO:11
- 383 3. Brett M., R. *et al.* Epidemiology of ovarian cancer: a review. *Cancer Biol. Med.* (2017).  
384 doi:10.20892/j.issn.2095-3941.2016.0084
- 385 4. Cannistra, S. A. Cancer of the Ovary. *N. Engl. J. Med.* **351**, 2519–2529 (2004).
- 386 5. Miller, D. S. *et al.* Phase II Evaluation of Pemetrexed in the Treatment of Recurrent or  
387 Persistent Platinum-Resistant Ovarian or Primary Peritoneal Carcinoma: A Study of  
388 the Gynecologic Oncology Group. *J. Clin. Oncol.* **27**, 2686–2691 (2009).
- 389 6. Armstrong, D. K. Relapsed ovarian cancer: challenges and management strategies for  
390 a chronic disease. *Oncologist* **7 Suppl 5**, 20–28 (2002).
- 391 7. Foley, O. W., Rauh-Hain, J. A. & del Carmen, M. G. Recurrent epithelial ovarian  
392 cancer: an update on treatment. *Oncology (Williston Park)*. **27**, 288–94, 298 (2013).
- 393 8. Ozols, R. F. Recurrent ovarian cancer: Evidence-based treatment. *Journal of Clinical*  
394 *Oncology* **20**, 1161–1163 (2002).
- 395 9. Walsh, T. *et al.* Mutations in 12 genes for inherited ovarian, fallopian tube, and  
396 peritoneal carcinoma identified by massively parallel sequencing. *Proc. Natl. Acad. Sci.*  
397 (2011). doi:10.1073/pnas.1115052108
- 398 10. Booth, M., Beral, V. & Smith, P. Risk factors for ovarian cancer: A case-control study.  
399 *Br. J. Cancer* (1989). doi:10.1038/bjc.1989.320
- 400 11. Vencken, P. M. L. H. *et al.* Chemosensitivity and outcome of BRCA1- and BRCA2-  
401 associated ovarian cancer patients after first-line chemotherapy compared with  
402 sporadic ovarian cancer patients. *Ann. Oncol.* (2011). doi:10.1093/annonc/mdq628
- 403 12. Patch, A. M. *et al.* Whole-genome characterization of chemoresistant ovarian cancer.  
404 *Nature* (2015). doi:10.1038/nature14410
- 405 13. Hao, D. *et al.* Immunogenomic analyses of advanced serous ovarian cancer reveal  
406 immune score is a strong prognostic factor and an indicator of chemosensitivity. *Clin.*  
407 *Cancer Res.* (2018). doi:10.1158/1078-0432.CCR-17-3862

- 408 14. Koti, M. *et al.* A distinct pre-existing inflammatory tumour microenvironment is  
409 associated with chemotherapy resistance in high-grade serous epithelial ovarian cancer.  
410 *Br. J. Cancer* (2015). doi:10.1038/bjc.2015.81
- 411 15. Au, K. K. *et al.* STAT1-associated intratumoural TH1 immunity predicts  
412 chemotherapy resistance in high-grade serous ovarian cancer. *J. Pathol. Clin. Res.*  
413 (2016). doi:10.1002/cjp2.55
- 414 16. Koti, M. *et al.* Identification of the IGF1/PI3K/NF  $\kappa$ B/ERK gene signalling networks  
415 associated with chemotherapy resistance and treatment response in high-grade serous  
416 epithelial ovarian cancer. *BMC Cancer* **13**, 549 (2013).
- 417 17. Cancer, T. & Atlas, G. Integrated genomic analyses of ovarian carcinoma. *Nature* **474**,  
418 609–15 (2011).
- 419 18. Li, J., Wood, W. H., Becker, K. G., Weeraratna, A. T. & Morin, P. J. Gene expression  
420 response to cisplatin treatment in drug-sensitive and drug-resistant ovarian cancer cells.  
421 *Oncogene* **26**, 2860–2872 (2007).
- 422 19. Langfelder, P. & Horvath, S. WGCNA: an R package for weighted correlation network  
423 analysis. *BMC Bioinformatics* **9**, 559 (2008).
- 424 20. Colaprico, A. *et al.* TCGAbiolinks: An R/Bioconductor package for integrative  
425 analysis of TCGA data. *Nucleic Acids Res.* (2016). doi:10.1093/nar/gkv1507
- 426 21. Irizarry, R. A. *et al.* Exploration, normalization, and summaries of high density  
427 oligonucleotide array probe level data. *Biostatistics* **4**, 249–264 (2003).
- 428 22. Gautier, L., Cope, L., Bolstad, B. M. & Irizarry, R. A. Affy - Analysis of Affymetrix  
429 GeneChip data at the probe level. *Bioinformatics* **20**, 307–315 (2004).
- 430 23. Smyth, G. limma: Linear Models for Microarray Data. in *Bioinformatics and*  
431 *Computational Biology Solutions Using R and Bioconductor* 397–420 (2005).  
432 doi:citeulike-article-id:5722720
- 433 24. Gentleman, R. *et al.* Bioconductor: open software development for computational  
434 biology and bioinformatics. *Genome Biol.* **5**, R80 (2004).
- 435 25. Shannon, P. *et al.* Cytoscape: A software Environment for integrated models of  
436 biomolecular interaction networks. *Genome Res.* **13**, 2498–2504 (2003).
- 437 26. Huang, D. W., Sherman, B. T. & Lempicki, R. A. Systematic and integrative analysis  
438 of large gene lists using DAVID bioinformatics resources. *Nat. Protoc.* **4**, 44–57  
439 (2009).
- 440 27. Warde-Farley, D. *et al.* The GeneMANIA prediction server: Biological network  
441 integration for gene prioritization and predicting gene function. *Nucleic Acids Res.* **38**,  
442 (2010).
- 443 28. Cotto, K. C. *et al.* DGIdb 3.0: a redesign and expansion of the drug–gene interaction  
444 database. *Nucleic Acids Res.* (2017). doi:10.1093/nar/gkx1143
- 445 29. Das, S. *et al.* Next-generation genotype imputation service and methods. *Nat. Genet.*  
446 (2016). doi:10.1038/ng.3656

- 447 30. The 1000 Genomes Project Consortium. A global reference for human genetic  
448 variation. *Nature* **526**, 68–74 (2015).
- 449 31. Loh, P. R. *et al.* Reference-based phasing using the Haplotype Reference Consortium  
450 panel. *Nat. Genet.* (2016). doi:10.1038/ng.3679
- 451 32. Delaneau, O. *et al.* Integrating sequence and array data to create an improved 1000  
452 Genomes Project haplotype reference panel. *Nat. Commun.* (2014).  
453 doi:10.1038/ncomms4934
- 454 33. Purcell, S. *et al.* PLINK: A tool set for whole-genome association and population-  
455 based linkage analyses. *Am. J. Hum. Genet.* **81**, 559–575 (2007).
- 456 34. Shabalin, A. A. Matrix eQTL: Ultra fast eQTL analysis via large matrix operations.  
457 *Bioinformatics* **28**, 1353–1358 (2012).
- 458 35. Peng, J. *et al.* VCP gene variation predicts outcome of advanced non-small-cell lung  
459 cancer platinum-based chemotherapy. *Tumor Biol.* **34**, 953–961 (2013).
- 460 36. Lan, B., Chai, S., Wang, P. & Wang, K. VCP/p97/Cdc48, A Linking of Protein  
461 Homeostasis and Cancer Therapy. *Curr. Mol. Med.* (2018).  
462 doi:10.2174/1566524018666180308111238
- 463 37. Wang, X. J., Feng, C. W. & Li, M. ADAM17 mediates hypoxia-induced drug  
464 resistance in hepatocellular carcinoma cells through activation of EGFR/PI3K/Akt  
465 pathway. *Mol. Cell. Biochem.* (2013). doi:10.1007/s11010-013-1657-z
- 466 38. Tung, S. L. *et al.* miRNA-34c-5p inhibits amphiregulin-induced ovarian cancer  
467 stemness and drug resistance via downregulation of the AREG-EGFR-ERK pathway.  
468 *Oncogenesis* (2017). doi:10.1038/oncsis.2017.25
- 469 39. Tian, J., Liu, R. & Qu, Q. Role of endoplasmic reticulum stress on cisplatin resistance  
470 in ovarian carcinoma. *Oncol. Lett.* (2017). doi:10.3892/ol.2017.5580
- 471 40. Xu, Y. *et al.* Tolerance to endoplasmic reticulum stress mediates cisplatin resistance in  
472 human ovarian cancer cells by maintaining endoplasmic reticulum and mitochondrial  
473 homeostasis. *Oncol. Rep.* (2015). doi:10.3892/or.2015.4283
- 474 41. Bastola, P., Neums, L., Schoenen, F. J. & Chien, J. VCP inhibitors induce endoplasmic  
475 reticulum stress, cause cell cycle arrest, trigger caspase-mediated cell death and  
476 synergistically kill ovarian cancer cells in combination with Salubrinal. *Mol. Oncol.*  
477 (2016). doi:10.1016/j.molonc.2016.09.005
- 478 42. Devlin, J., Elder, P. A., Gabra, H., Steel, C. M. & Knowles, M. A. High frequency of  
479 chromosome 9 deletion in ovarian cancer: Evidence for three tumour-suppressor loci.  
480 *Br. J. Cancer* (1996). doi:10.1038/bjc.1996.75
- 481 43. Lin, R. *et al.* Long-term cisplatin exposure promotes methylation of the OCT1 gene in  
482 human esophageal cancer cells. *Dig. Dis. Sci.* (2013). doi:10.1007/s10620-012-2424-9
- 483 44. Keita, M. *et al.* The RUNX1 transcription factor is expressed in serous epithelial  
484 ovarian carcinoma and contributes to cell proliferation, migration and invasion. *Cell*  
485 *Cycle* (2013). doi:10.4161/cc.23963

- 486 45. Koussounadis, A., Langdon, S. P., Harrison, D. J. & Smith, V. A. Chemotherapy-  
487 induced dynamic gene expression changes in vivo are prognostic in ovarian cancer. *Br.*  
488 *J. Cancer* **110**, 2975–2984 (2014).
- 489 46. Wu, Y. *et al.* Cholesterol reduces the sensitivity to platinum-based chemotherapy via  
490 upregulating ABCG2 in lung adenocarcinoma. *Biochem. Biophys. Res. Commun.*  
491 (2015). doi:10.1016/j.bbrc.2015.01.035
- 492 47. Kim, S., Lee, M., Dhanasekaran, D. N. & Song, Y. S. Activation of LXR $\alpha$  by  
493 cholesterol in malignant ascites promotes chemoresistance in ovarian cancer. *BMC*  
494 *Cancer* **18**, 1232 (2018).
- 495
- 496

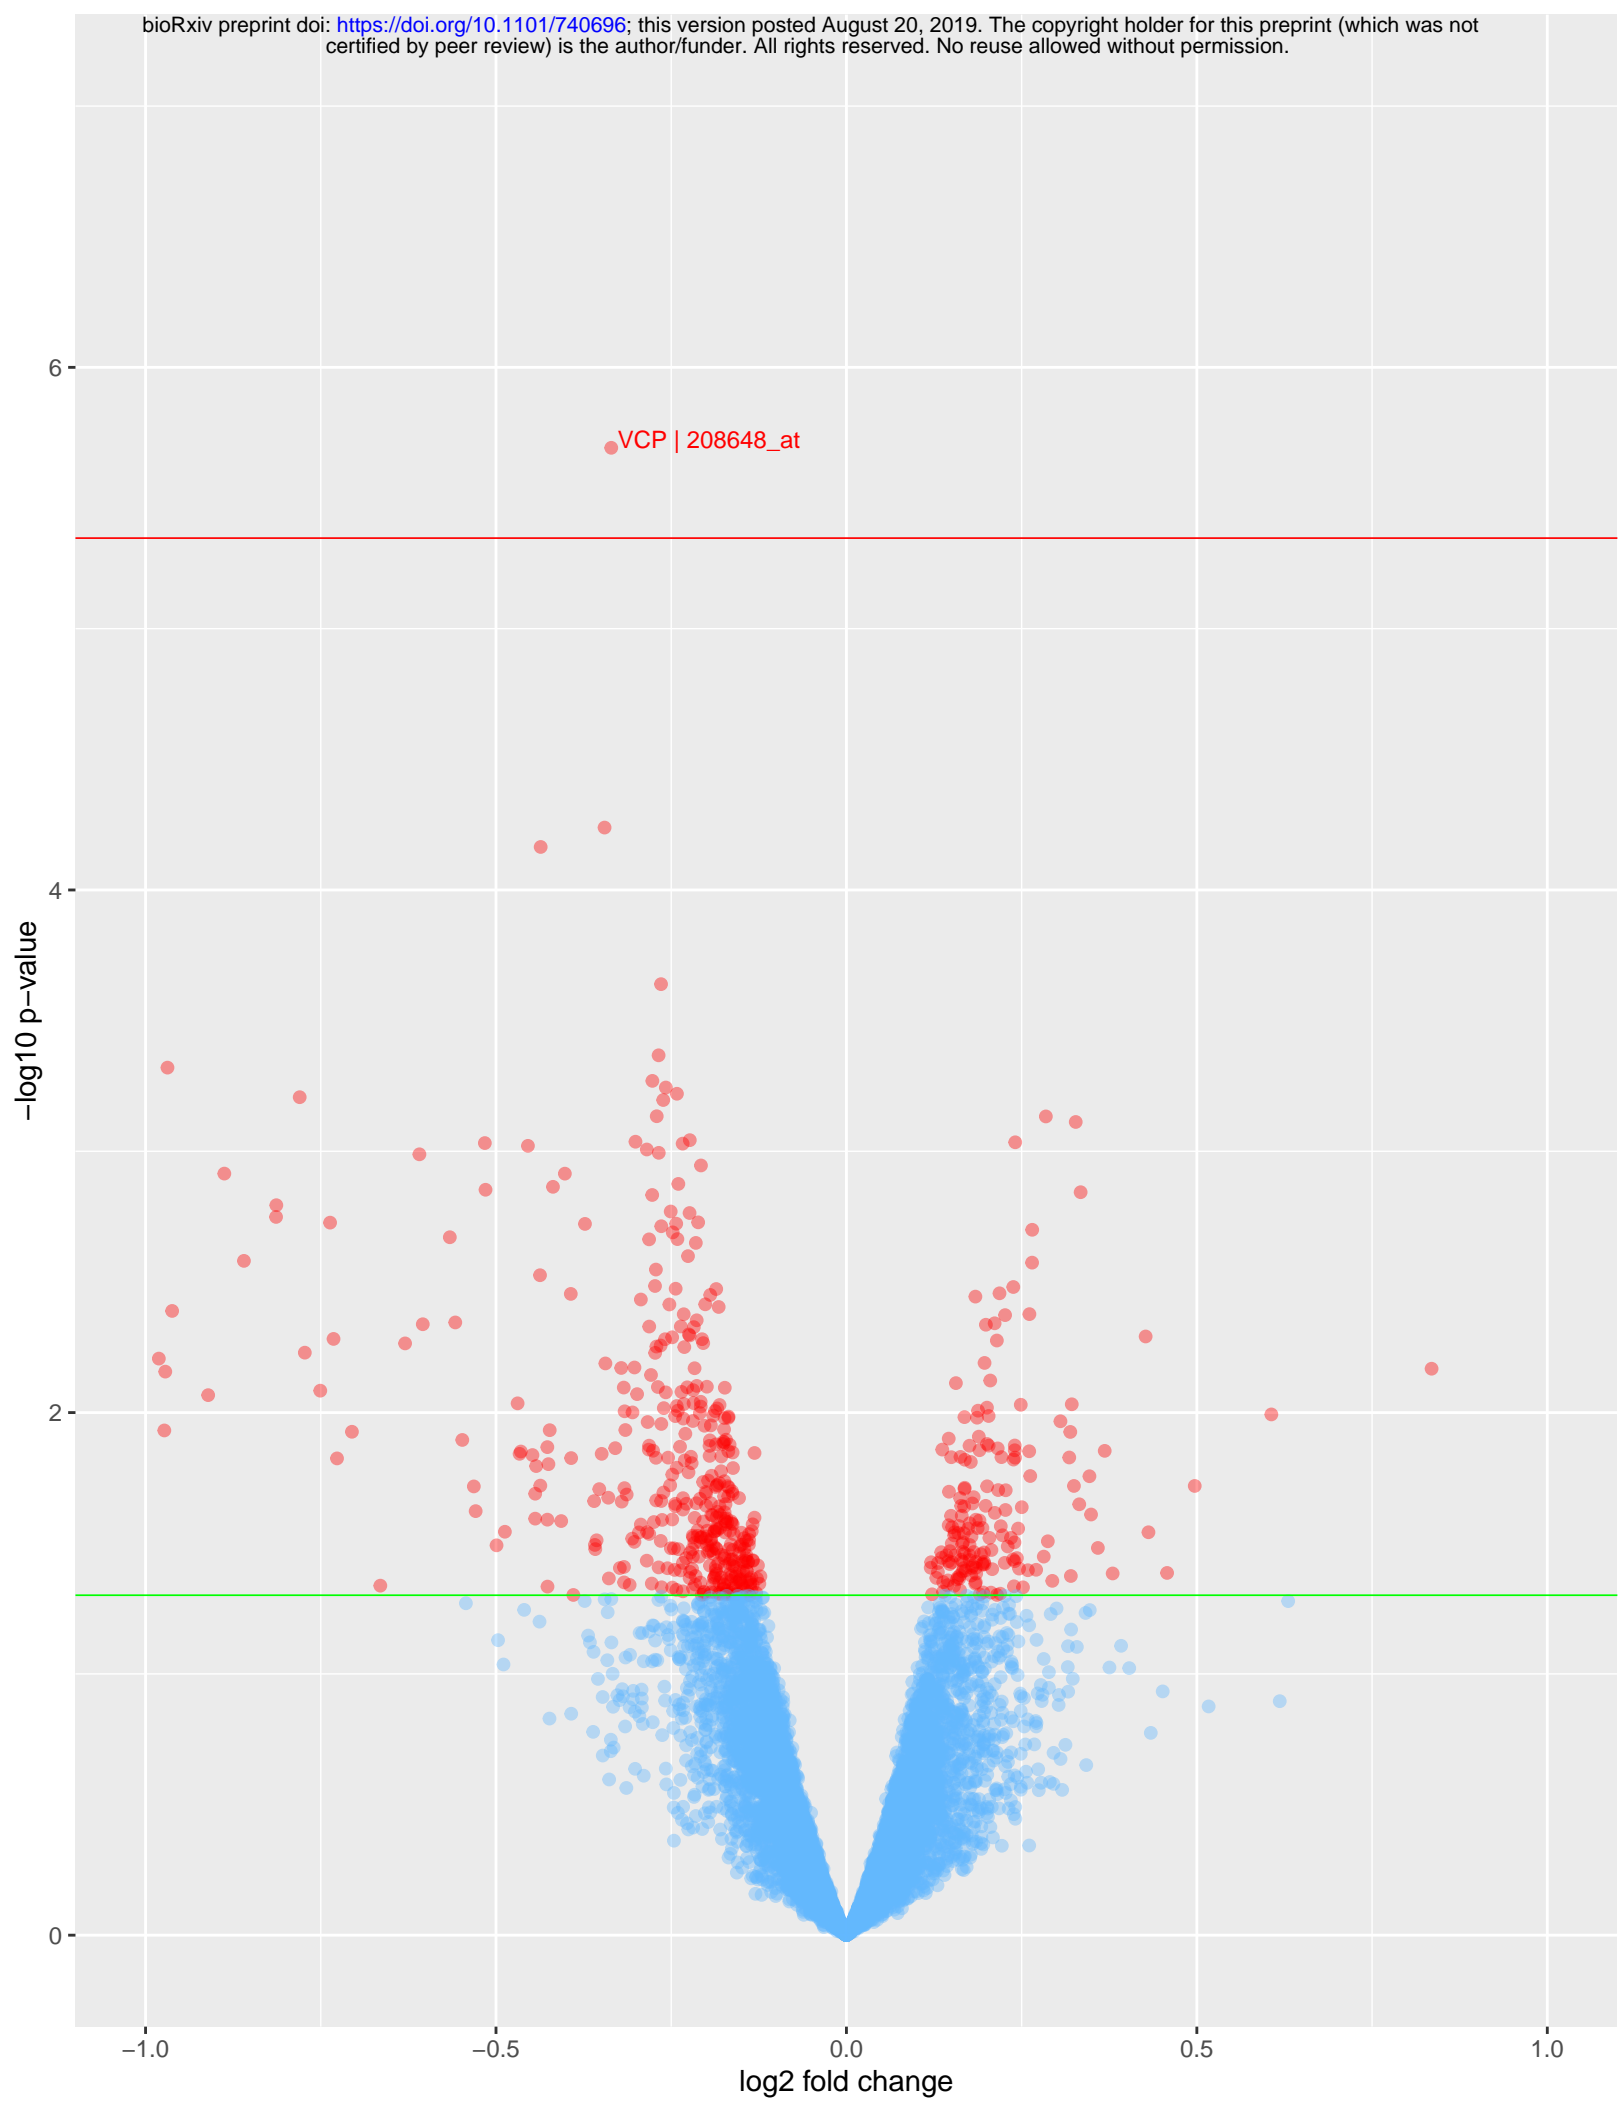





# Manhattan Plot

bioRxiv preprint doi: <https://doi.org/10.1101/740696>; this version posted August 20, 2019. The copyright holder for this preprint (which was not certified by peer review) is the author/funder. All rights reserved. No reuse allowed without permission.

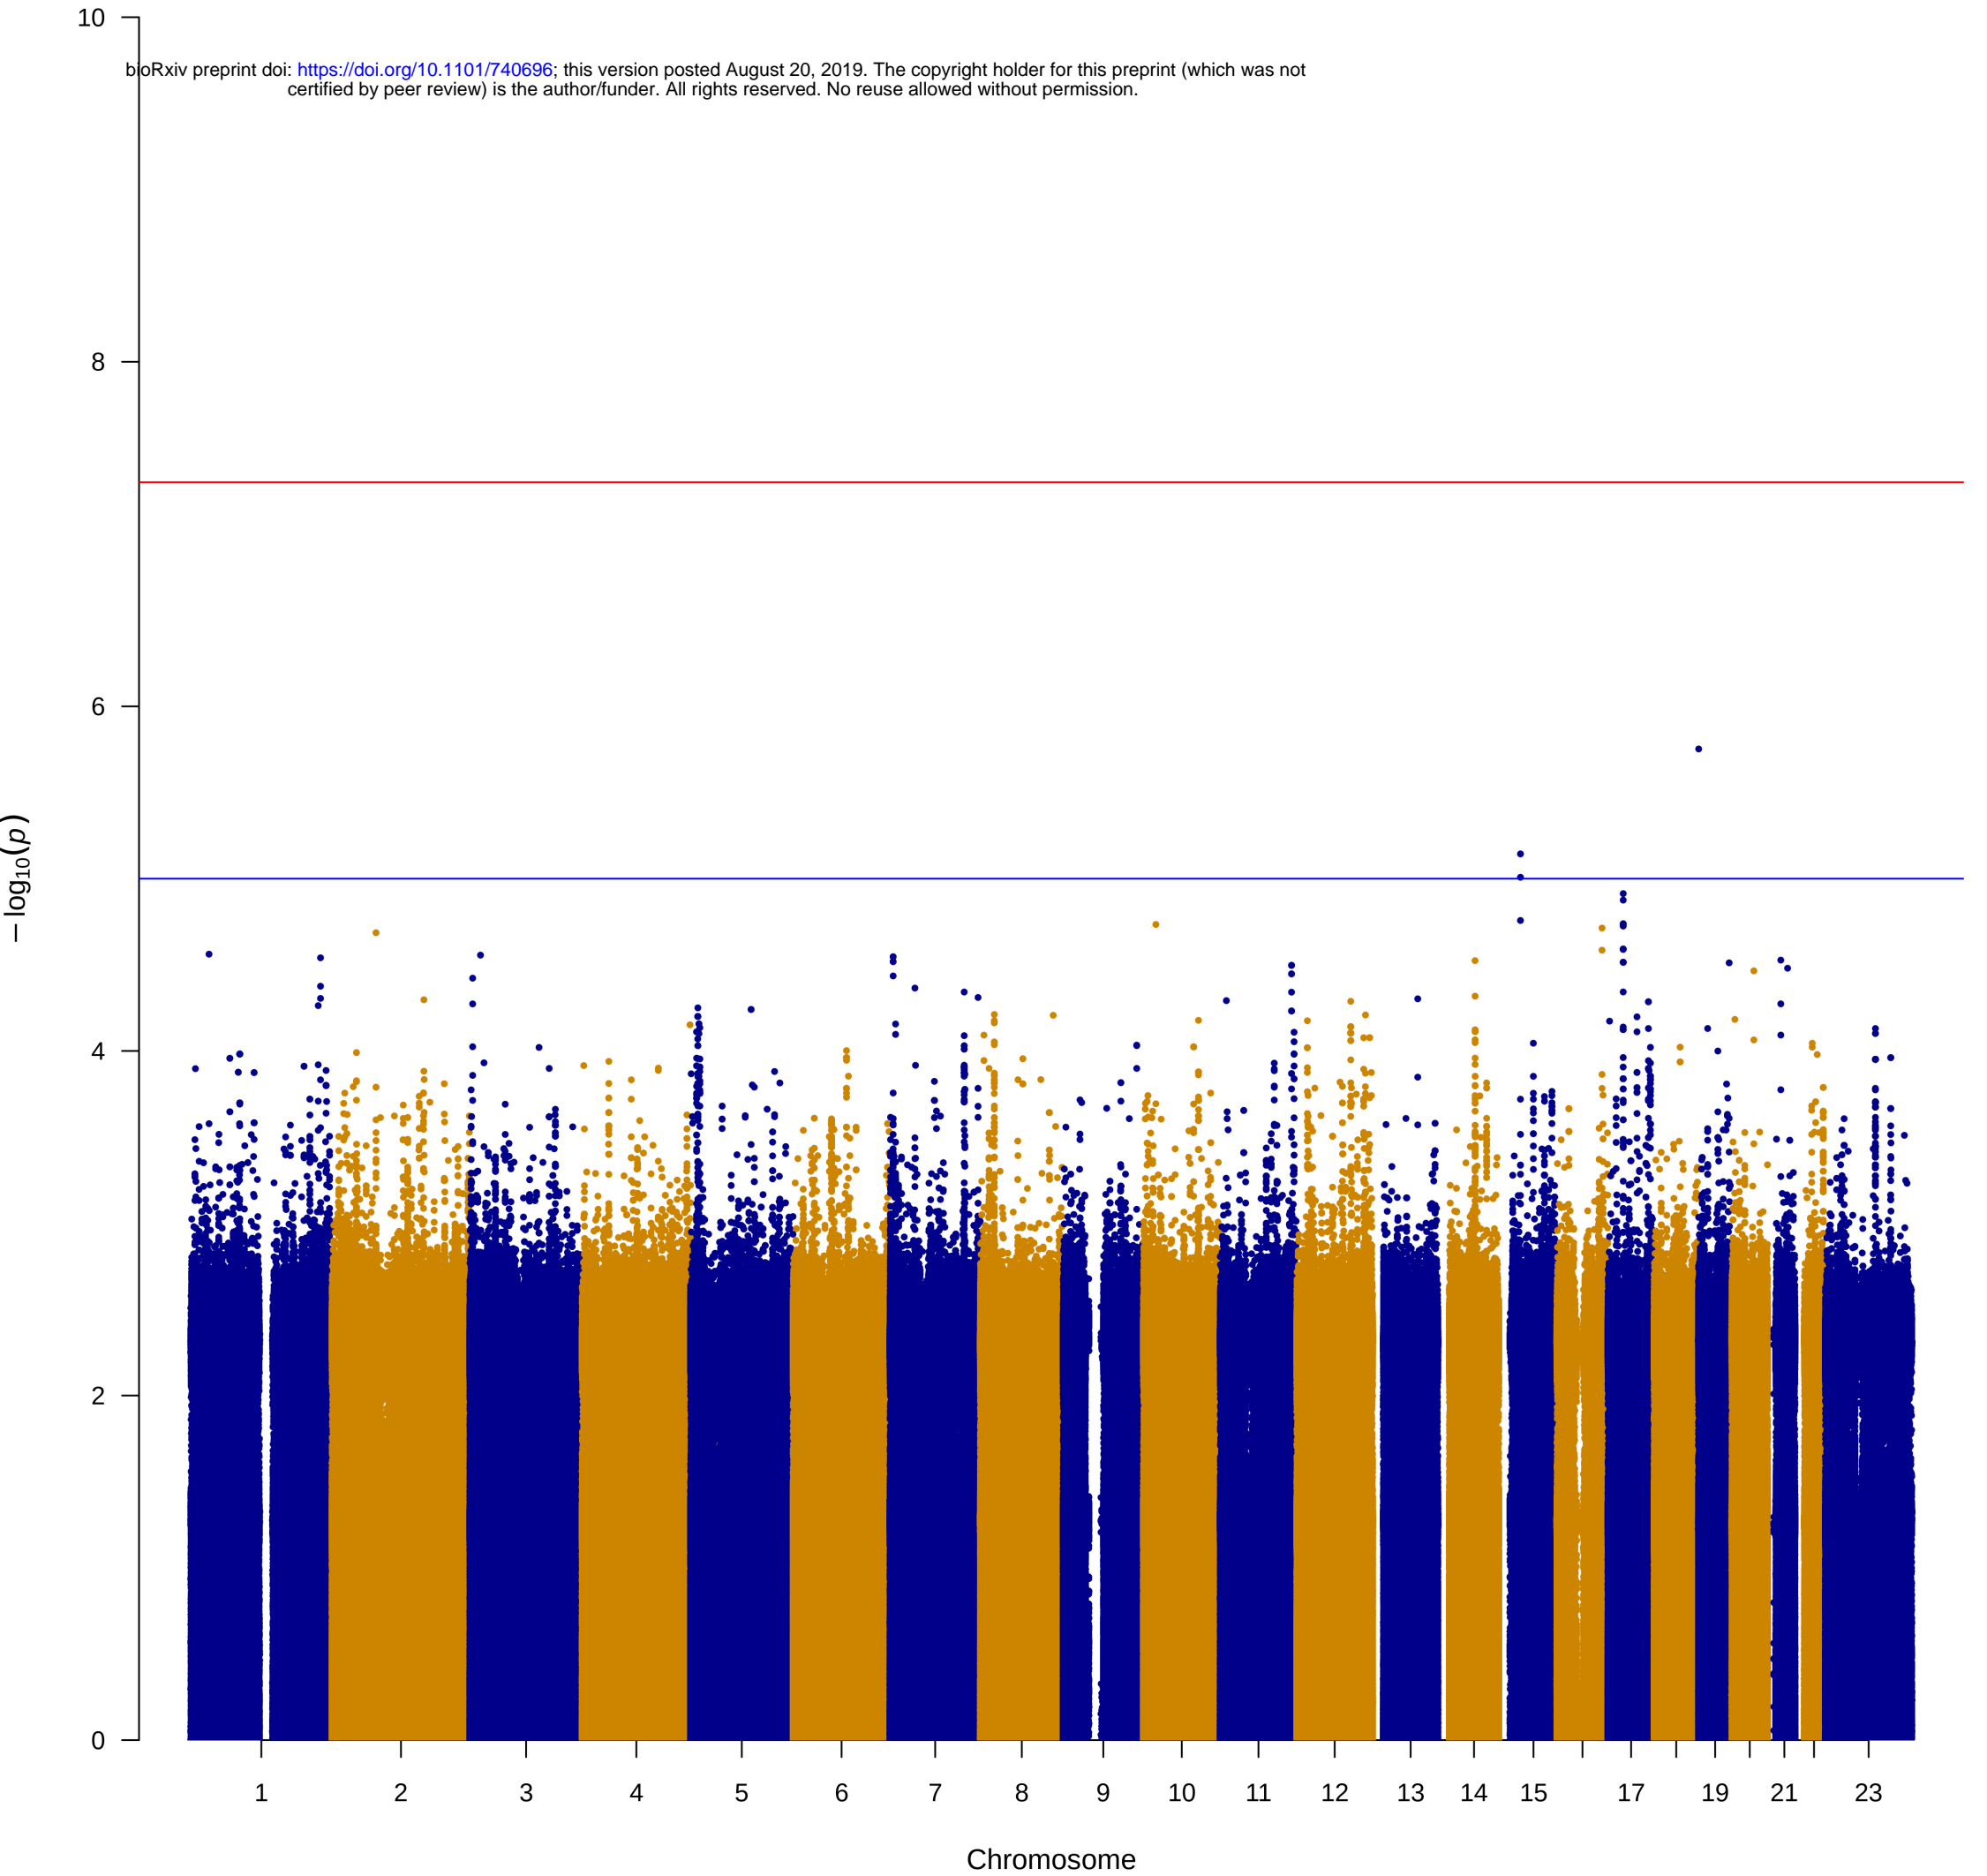

Source: http://biorxiv.org/content/10.1101/740696v1.full.pdf
